# Supplementary material for: Empowering Children Through School Re-Entry Activities After the COVID-19 Pandemic
Source: PubMed Central journal article supplement (PMC11104315; doi:10.5334/cie.17), 2020-05-15
Supplement: cie-1-1-17-s2.pdf [file cie-1-1-17-s2.pdf]

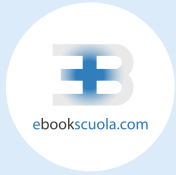

## Draw a moment of these days

WS 1

In these days you have heard of the Coronavirus and you had to stay home.  
Draw a moment that has remained in your mind from this period at home.

Your class:

how old are you?

You are:

Male

or

Female

Now show the drawing to your partner and discuss. Are there any similarities? And differences?

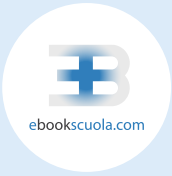

# John and Mary's thoughts

WS 2

John and Mary have heard of Coronavirus from their parents and on television and have different thoughts. What are they thinking? (You can write words or draw pictures)

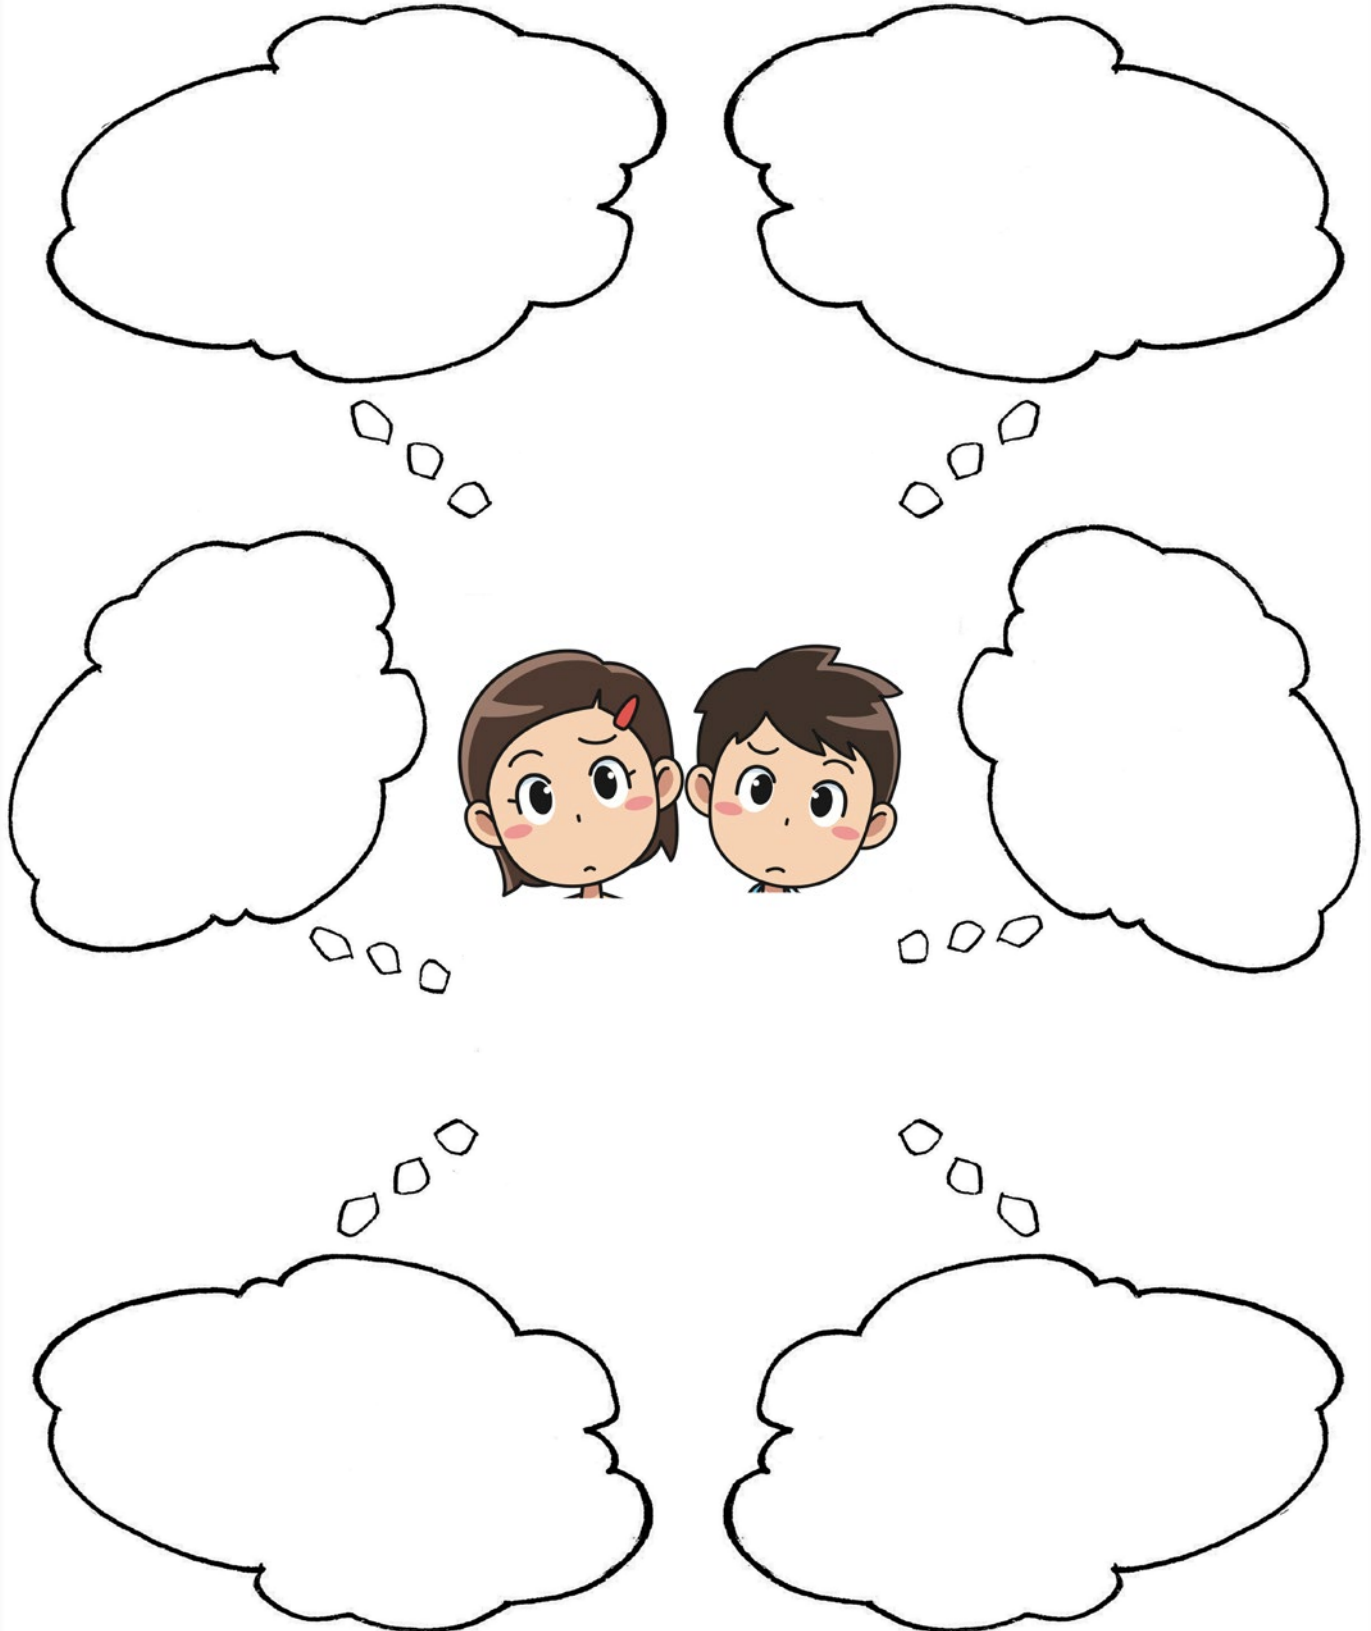

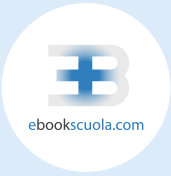

# When I'm worried

WS 3

Do you happen to be worried or have problems? Write:

- In the first column, the things that worry you or the problems you happen to have;
- In the central column, indicate the things you do to get past bad thoughts, or to overcome your problem
- In the last column write the name of some people who may help you when you are worried.

| WHEN I'M WORRIED ...      |                              |                 |
|---------------------------|------------------------------|-----------------|
| My worries or my problems | What do I do to resolve them | Who can help me |
|                           |                              |                 |
|                           |                              |                 |
|                           |                              |                 |
|                           |                              |                 |
|                           |                              |                 |
|                           |                              |                 |

How many things can you do to solve your problems or concerns?

Count them and write the total here:

Now tell a classmate near you what you wrote. Do you have concerns in common? And what do you similarly do to feel better?



## How do you imagine the coronavirus? Draw it!

WS 4

You have heard of Coronavirus these days. How do you imagine it? Draw it here.

Your class:

How old are you?

You are:

Male

or

Female

Adesso mostra il disegno ad un tuo compagno o compagna; ci sono delle somiglianze? E delle differenze?

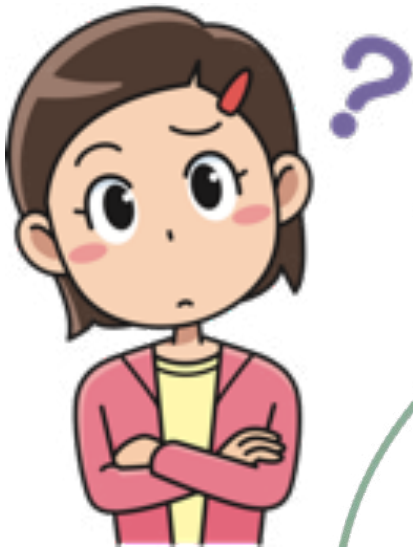

I forgot what to do to avoid getting infected by germs!

Can you give me some advice?

Write them below!

Write down three important rules for not getting infected by viruses:

1.
2.
3.

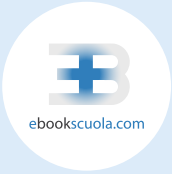

# Back to school again

It's nice to be all together!!

WS 6

Write the name of some of your mates on the carousel:

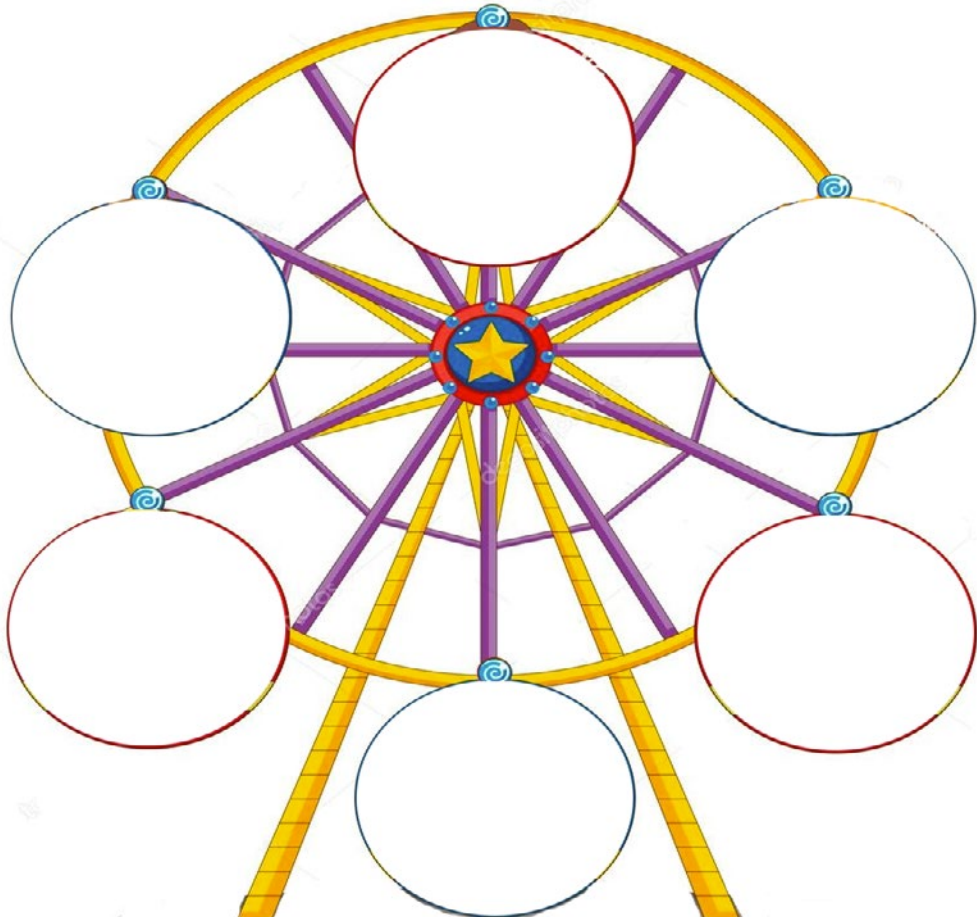

Write on the balloon the things you will do together in school in the next days:

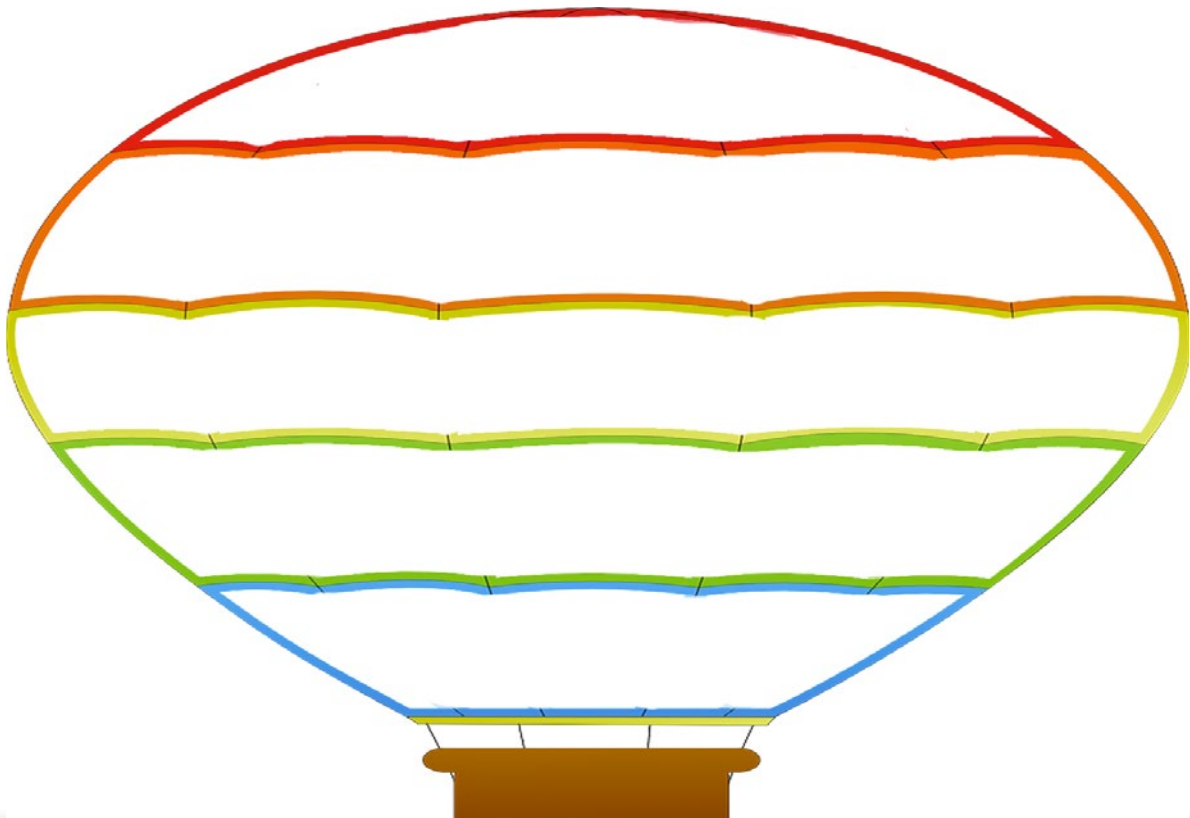

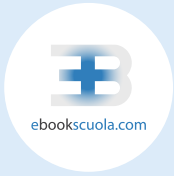

## Activity Assessment Questionnaire (QVA / Covid)

Now that you are done filling out these sheets, we would like to know if you liked them.

Please carefully read each question and mark with a cross the answer that comes closest to your way of thinking right now, that is, the one with which you are most in agreement.

|                                                                                          | NOT AT ALL            | A LITTLE              | SO-SO                 | SOME                  | VERY MUCH             |
|------------------------------------------------------------------------------------------|-----------------------|-----------------------|-----------------------|-----------------------|-----------------------|
| 1. I enjoyed completing these activities.                                                | <input type="radio"/> | <input type="radio"/> | <input type="radio"/> | <input type="radio"/> | <input type="radio"/> |
| 2. These activities helped me to get know my classmates better.                          | <input type="radio"/> | <input type="radio"/> | <input type="radio"/> | <input type="radio"/> | <input type="radio"/> |
| 3. By doing these activities, I learned how to better deal with my problems or concerns. | <input type="radio"/> | <input type="radio"/> | <input type="radio"/> | <input type="radio"/> | <input type="radio"/> |
| 4. I felt involved and listened to the others while doing these activities               | <input type="radio"/> | <input type="radio"/> | <input type="radio"/> | <input type="radio"/> | <input type="radio"/> |
| 5. If I had the chance, I would like to do other activities similar to these.            | <input type="radio"/> | <input type="radio"/> | <input type="radio"/> | <input type="radio"/> | <input type="radio"/> |

6. What activity do you like the most?

7. The activities that you did could be improved? How?
